# Supplementary material for: NaBH4-Mediated Co-Reduction Synthesis of Glutathione Stabilized Gold/Silver Nanoclusters for Detection of Magnesium Ions
Source: Preprints.org preprint supplement (doi:10.20944/preprints202307.1031.v1), 2023-07-17
Supplement: Supplementary file 1 [file supplementary]

*Supplementary Material*

NaBH4-Mediated Co-Reduction Synthesis of Glutathione Stabilized Gold/Silver Nanoclusters for Detection of Magnesium Ions

Weiwei Chen 1, Yiying Chen 1, Xianhu Zhu 2, Miaomiao Xu 1, Zhihao Han 2, Lianhui Wang 2 and Lixing Weng 1,*

1 School of Geographic and Biologic Information, Nanjing University of Posts and Telecommunications, Nanjing 210023, China; chenww@njupt.edu.cn (W.C.); 2786222392@qq.com (Y.C.); xumiaomiao@njupt.edu.cn (M.X)

2 State Key Laboratory for Organic Electronics and Information Displays, Jiangsu Key Laboratory for Biosensors, Institute of Advanced Materials (IAM), Jiangsu National Synergetic Innovation Center for Advanced Materials (SICAM), Nanjing University of Posts & Telecommunications, Nanjing 210023, China; 1221066727@njupt.edu.cn (X.Z.); 17698067082@163.com (Z.H.); iamlhwang@njupt.edu.cn (L.W.)

***** Correspondence: lxweng@njupt.edu.cn





**Figure S1**: Optimization of NaBH4 concentration for GSH@AuAg NCs preparation at 0.5 mM Au and Ag precursors, and 1.0 mM GSH.





**Figure S2:** Fluorescent spectra of GSH@AuAg NCs obtained after mixing 0.5 mM Au and Ag precursors, 1.0 mM GSH and 0.75 mM NaBH4 for different times.

**Table S1:** Detection of Mg2+ in three purified drinking water samples.

| **Sample** | **Added**  **(nM)** | **Detected**  **(nM)** | **Recovery**  **(%)** | **RSDs**  **(%)** |
| --- | --- | --- | --- | --- |
| 1 | 300 | 292.3 | 97.4 | 3.1 |
| 2 | 600 | 577.5 | 96.2 | 5.1 |
| 3 | 900 | 852.3 | 94.7 | 6.7 |
